# Supplementary material
Source: publisher figshare collection journal article supplement (https://gsajournals.figshare.com/ndownloader/files/20276253)
Supplement: Supplementary file 1 [file 20276253]

## Sheet: Tier1 TF targets
FileS4.1: TF targets
1. Predicted Transcription Factor Targets from level 1 (tier1)
Tier 1 TF name	Tier 1 TF gene id	Target gene names	Target gene ids
GBF1	GRMZM2G011932	Zm00001d043180	AC213654.3_FG004
	Zm00001d039065	prh6	GRMZM2G308615
		hb70	GRMZM2G396527
		prh9	GRMZM5G818101
		prh10	GRMZM2G019819
		snrkII1	GRMZM2G035809
		Zm00001d047290	GRMZM2G053831
		Zm00001d047705	GRMZM2G057959
		prh3	GRMZM2G059453
		Zm00001d010652	GRMZM2G073324
		prh7	GRMZM2G082487
		prh18	GRMZM2G134628
		Zm00001d047037	GRMZM2G134731
		Zm00001d028793	GRMZM2G144224
		pyl3	GRMZM2G154987
		prh11	GRMZM2G159811
		prh4	GRMZM2G166297
		prh12	GRMZM2G177386
		prh20	GRMZM2G300125
		nced4	GRMZM2G408158
		bzip49	GRMZM2G478417
		bzip4	GRMZM2G479760
		Zm00001d022069	GRMZM5G831577
hb41	GRMZM2G117164	prh11	GRMZM2G159811
	Zm00001d017422	prh4	GRMZM2G166297
		prh6	GRMZM2G308615
		prh9	GRMZM5G818101
		abh4	GRMZM2G065928
		Zm00001d010652	GRMZM2G073324
		prh18	GRMZM2G134628
		bzip49	GRMZM2G478417
		Zm00001d043180	AC213654.3_FG004
		prh10	GRMZM2G019819
		Zm00001d047290	GRMZM2G053831
		Zm00001d047705	GRMZM2G057959
		prh3	GRMZM2G059453
		prh7	GRMZM2G082487
		Zm00001d047037	GRMZM2G134731
		Zm00001d028793	GRMZM2G144224
		pyl3	GRMZM2G154987
		prh12	GRMZM2G177386
		prh20	GRMZM2G300125
		nactf60	GRMZM2G336533
		nced4	GRMZM2G408158
		nced5	GRMZM2G417954
		bzip4	GRMZM2G479760
		Zm00001d022069	GRMZM5G831577
hb120	GRMZM2G056600	Zm00001d044120	GRMZM2G177384
	Zm00001d020804	Zm00001d053049	GRMZM2G046024
		bzip49	GRMZM2G478417
		Zm00001d022069	GRMZM5G831577
		cdpk17	GRMZM2G025387
		snrkII1	GRMZM2G035809
		Zm00001d047290	GRMZM2G053831
		bhlh146	GRMZM2G085467
		prh12	GRMZM2G177386
myb50	GRMZM2G145444	cdpk17	GRMZM2G025387
	Zm00001d015614	prh3	GRMZM2G059453
		Zm00001d010652	GRMZM2G073324
		prh6	GRMZM2G308615
		nactf49	GRMZM2G347043
		prh9	GRMZM5G818101
		Zm00001d022069	GRMZM5G831577
bzip1	GRMZM2G117851	prh11	GRMZM2G159811
	Zm00001d043992	snrkII1	GRMZM2G035809
		prh3	GRMZM2G059453
		bhlh146	GRMZM2G085467
		prh4	GRMZM2G166297
		Zm00001d044120	GRMZM2G177384
		prh9	GRMZM5G818101
		Zm00001d022069	GRMZM5G831577
myb153	GRMZM2G050550	Zm00001d044120	GRMZM2G177384
	Zm00001d019712	Zm00001d047705	GRMZM2G057959
		Zm00001d047037	GRMZM2G134731
		Zm00001d028793	GRMZM2G144224
		snrkII1	GRMZM2G035809
		prh9	GRMZM5G818101
hb62	GRMZM2G105834	Zm00001d043180	AC213654.3_FG004
	Zm00001d047995	Zm00001d044120	GRMZM2G177384
		prh12	GRMZM2G177386
		prh9	GRMZM5G818101
		Zm00001d047290	GRMZM2G053831
ca3p4	GRMZM2G384528	hb70	GRMZM2G396527
	Zm00001d022099	prh11	GRMZM2G159811
hb11	GRMZM2G127537	Zm00001d028793	GRMZM2G144224
	Zm00001d020670	pyl3	GRMZM2G154987
cadtfr6	GRMZM2G180947	Zm00001d053049	GRMZM2G046024
	Zm00001d006813

## Sheet: Tier2 TF targets
FileS4.2: TF targets
2. Predicted Transcription Factor Targets from level 2 (tier2)
Tier 2 TF name	Tier 2 TF gene id	Target gene names	Target gene ids
bzip49	GRMZM2G478417	Zm00001d043180	AC213654.3_FG004
		prh10	GRMZM2G019819
		Zm00001d053049	GRMZM2G046024
		Zm00001d047290	GRMZM2G053831
		Zm00001d047705	GRMZM2G057959
		prh3	GRMZM2G059453
		Zm00001d010652	GRMZM2G073324
		prh7	GRMZM2G082487
		prh13	GRMZM2G134628
		Zm00001d047037	GRMZM2G134731
		Zm00001d028793	GRMZM2G144224
		prh11	GRMZM2G159811
		prh4	GRMZM2G166297
		prh12	GRMZM2G177386
		prh20	GRMZM2G300125
		prh6	GRMZM2G308615
		nced4	GRMZM2G408158
		prh9	GRMZM5G818101
		Zm00001d022069	GRMZM5G831577
bzip4	GRMZM2G479760	Zm00001d043180	AC213654.3_FG004
		prh10	GRMZM2G019819
		Zm00001d053049	GRMZM2G046024
		Zm00001d047290	GRMZM2G053831
		prh3	GRMZM2G059453
		Zm00001d010652	GRMZM2G073324
		prh7	GRMZM2G082487
		prh13	GRMZM2G134628
		prh11	GRMZM2G159811
		prh4	GRMZM2G166297
		prh12	GRMZM2G177386
		prh6	GRMZM2G308615
		nced4	GRMZM2G408158
		nced5	GRMZM2G417954
		prh9	GRMZM5G818101
		Zm00001d022069	GRMZM5G831577
hb70	GRMZM2G396527	prh11	GRMZM2G159811

## Sheet: Tier3 TF targets
FileS4.3: TF targets
3. Predicted Transcription Factor Targets from level 3 (tier3)
Tier 3 TF name	Tier 3 TF gene id	Target gene names	Target gene ids
nactf49	GRMZM2G347043	prh7	GRMZM2G082487
		prh11	GRMZM2G159811
		nced5	GRMZM2G417954
		Zm00001d043180	AC213654.3_FG004
		Zm00001d047290	GRMZM2G053831
		Zm00001d044120	GRMZM2G177384
		abh1	GRMZM2G179147
		cdpk17	GRMZM2G025387
		Zm00001d010652	GRMZM2G073324
		nced4	GRMZM2G408158
nactf60	GRMZM2G336533	prh12	GRMZM2G177386
		abh1	GRMZM2G179147
		nced5	GRMZM2G417954
		pyl3	GRMZM2G154987
		prh4	GRMZM2G166297
		Zm00001d053049	GRMZM2G046024
		prh6	GRMZM2G308615
bhlh146	GRMZM2G085467	Zm00001d043180	AC213654.3_FG004
		prh4	GRMZM2G166297
